# Supplementary material for: Older Adult and Primary Care Practitioner Perspectives on Using, Prescribing, and Deprescribing Opioids for Chronic Pain
Source: PubMed Central journal article supplement (PMC10918495; doi:10.1001/jamanetworkopen.2024.1342), 2024-03-06
Supplement: jamanetwopen-e241342-s002.pdf [file jamanetwopen-e241342-s002.pdf]

## Data Sharing Statement

Anderson. Older Adult and Primary Care Practitioner Perspectives on Using, Prescribing, and Deprescribing Opioids for Chronic Pain. *JAMA Netw Open*. Published March 06, 2024.  
doi:10.1001/jamanetworkopen.2024.1342

### Data

**Data available:** No

### Additional Information

**Explanation for why data not available:** Codebooks are available as part of the supplement.
